# Supplementary material
Source: publisher site journal article supplement (https://www.dovepress.com/article/201871)

**Supplementary materials**

**Figure S1** The distribution of quantitative information of 15 endometrial tissues after median normalization by boxplot analysis. N: normal control; A: GnRH antagonist treated group (GnRH-ant); La: GnRH agonist treated group (GnRH-a).


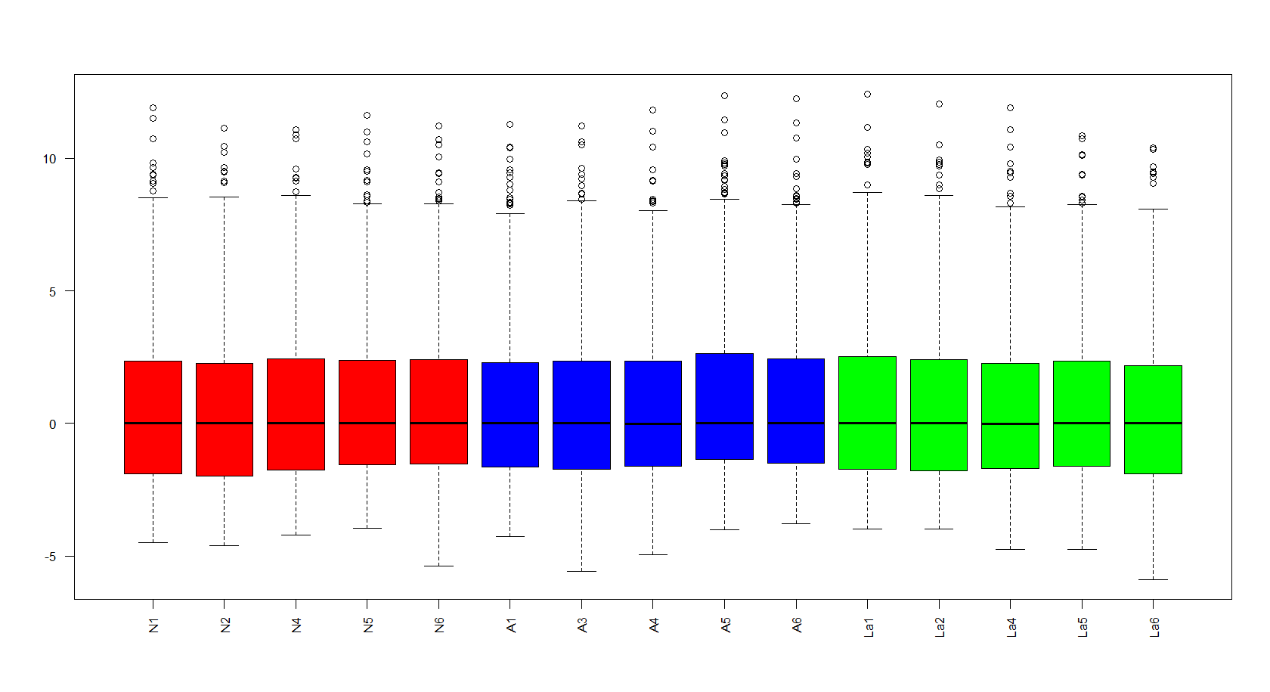


**Figure S2** Reproducibility of Lable-freeLC-MS/MS separations and identification. The correlations between the data of duplicate 1 and duplicate 2 were analyzed.


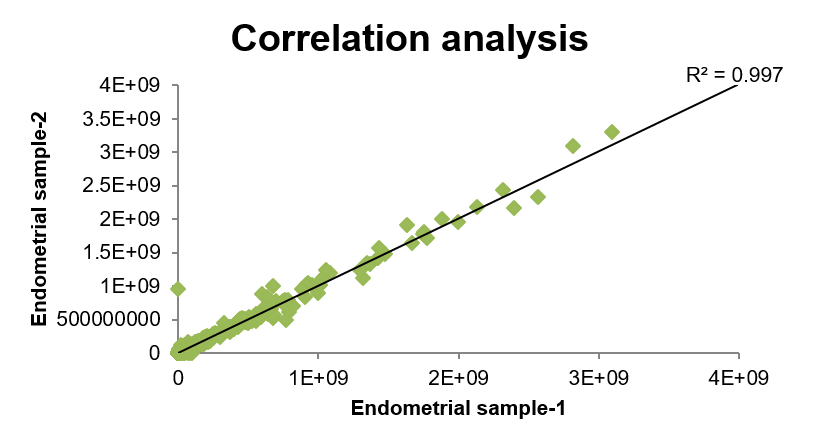

Supplement: Supplementary file 1 [file get_supplementary_file.php]
